# Supplementary material
Source: publisher figshare collection journal article supplement (https://acs.figshare.com/ndownloader/files/18678995)
Supplement: Supplementary file 1 [file 18678995]

# **Solvent-induced chirality switching in the enantioseparation of halogen-substituted mandelic acids: Structural effects on molecular packing**

Koichi Kodama\*, Kozue Kawasaki, Meng Yi, Kaguya Tsukamoto, Hiroaki Shitara and Takuji

Hirose

*Graduate School of Science and Engineering, Saitama University*

*255 Shimo-ohkubo, Sakura-ku, Saitama City, Saitama 338-8570, Japan*

---

## **Table of Contents**

---

|                                |         |
|--------------------------------|---------|
| Figures S1-S9 and Tables S1-S2 | S2-S16  |
| Experimental detail            | S17-S20 |
| References                     | S20     |

---

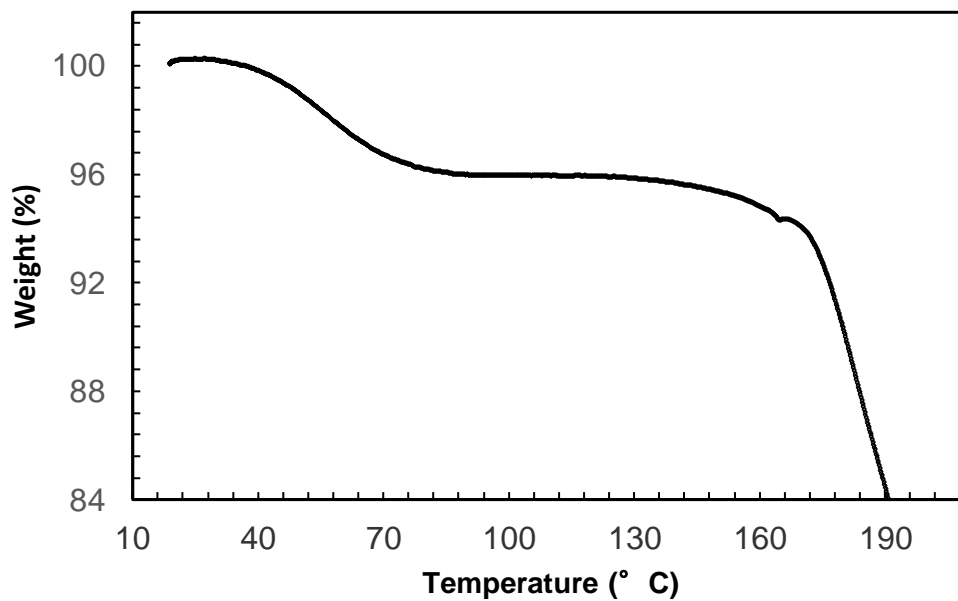

Figure S1. TGA chart of (*S*)-*p*-Br-MA·(+)-ADPE salt (enantiomer of the (*R*)-*p*-Br-MA·(-)-ADPE salt) crystallized from water. Heating rate was 10 °C/min.

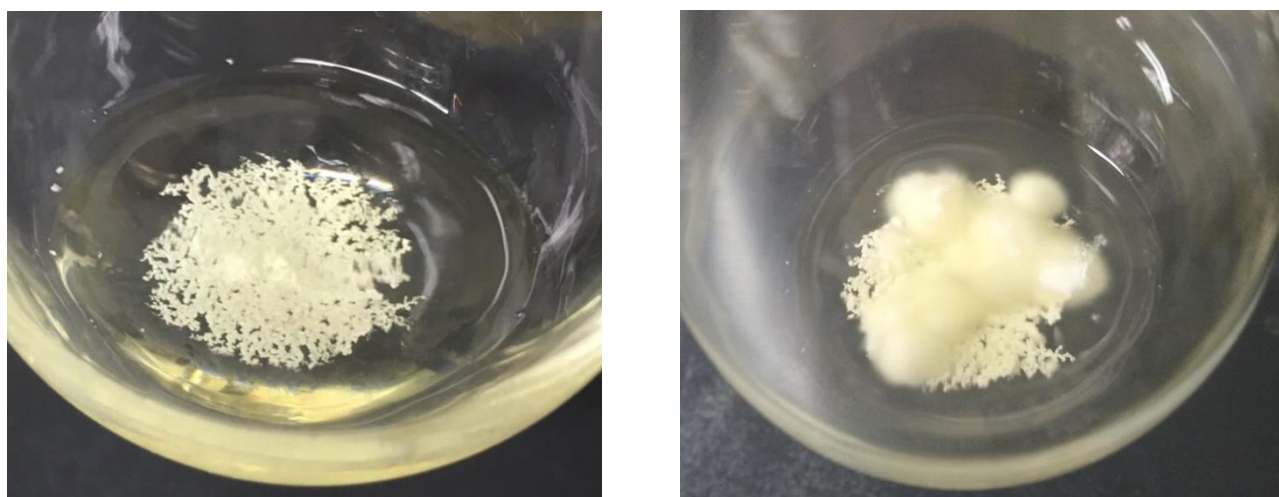

Figure S2. Photographs of the deposited solid in the enantioseparation of *p*-F-MA with (-)-ADPE in acetone. The hot solution was stood at room temperature for about 1 h (left) and 10 h (right).

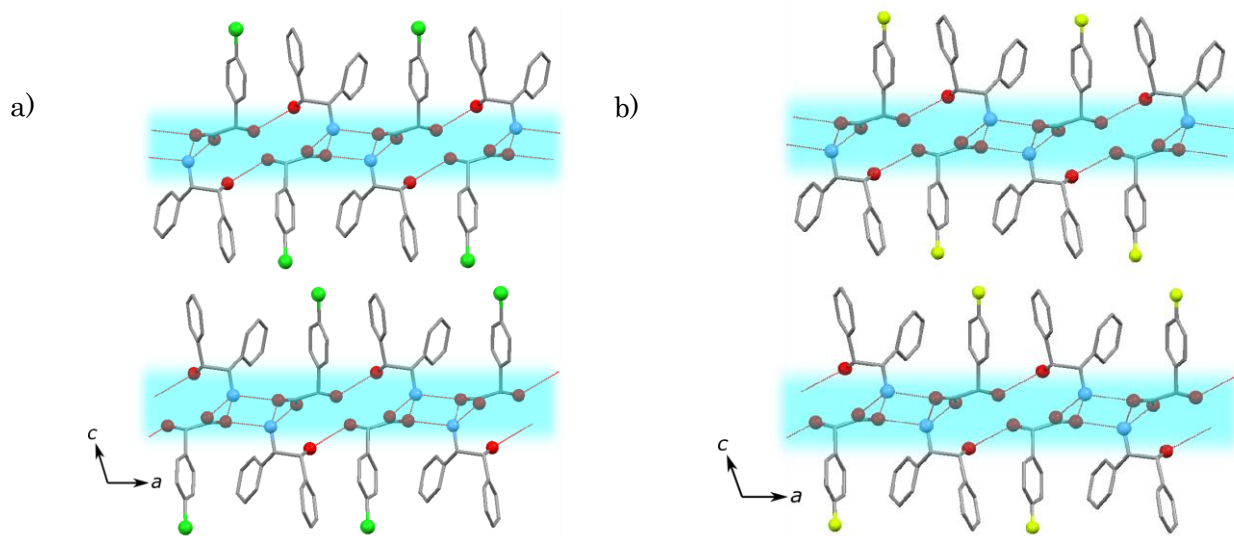

Figure S3. Crystal structures of less-soluble diastereomeric salts a) (*S*)-*p*-Cl-MA·(-)-ADPE, and b) (*S*)-*p*-F-MA·(-)-ADPE. Oxygen and nitrogen atoms are represented with red and blue balls. Halogen atoms are represented with yellow to green balls. The dotted lines show hydrogen bonds.

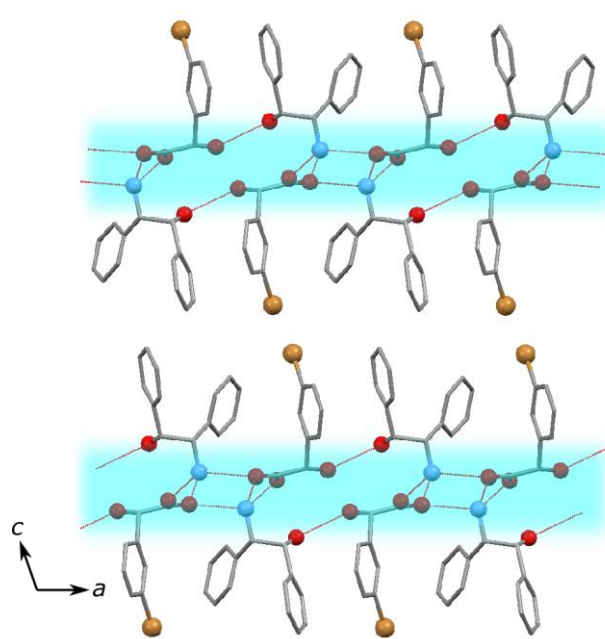

Figure S4. Crystal structure of less-soluble (*S*)-*m*-Br-MA·(-)-ADPE salt prepared from chloroform solution. Oxygen and nitrogen atoms are represented with red and blue balls. Bromine atoms are represented with green balls. The dotted lines show hydrogen bonds.

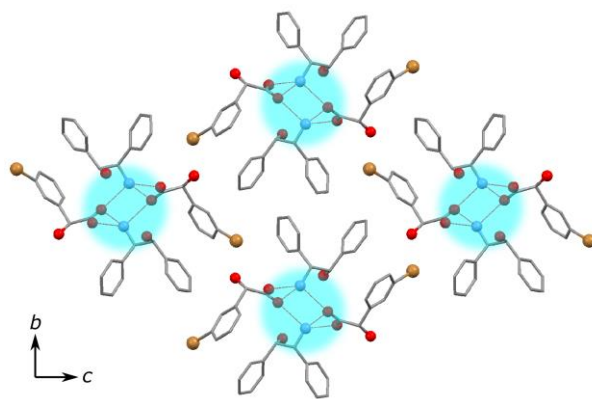

Figure S5. Crystal structure of more-soluble (*S*)-*m*-Br-MA·(+)-ADPE salt prepared from chloroform solution. Oxygen and nitrogen atoms are represented with red and blue balls. Bromine atoms are represented with green balls. The dotted lines show hydrogen bonds.

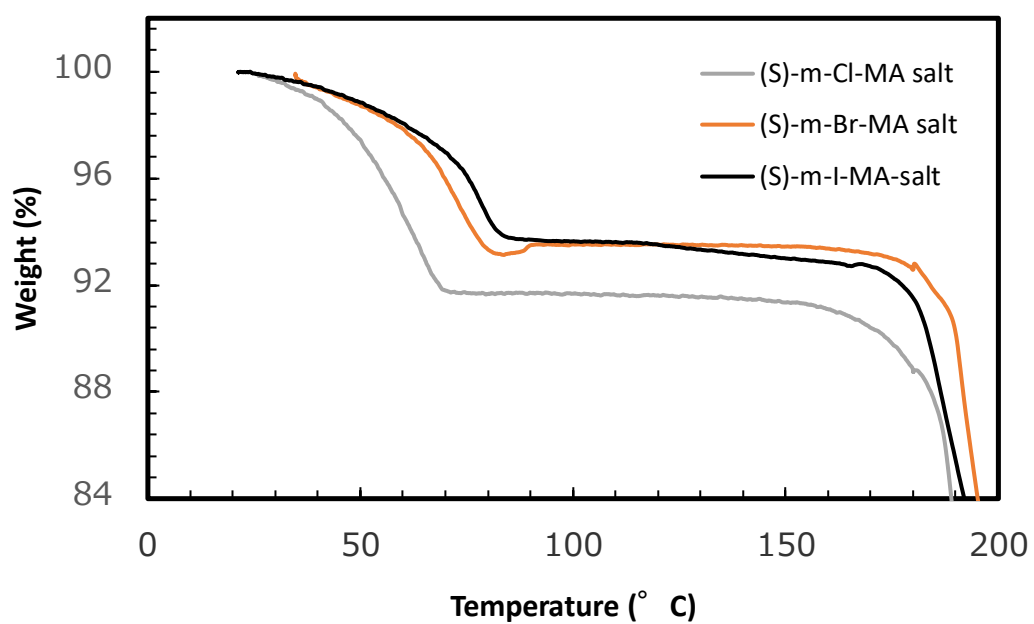

Figure S6. TGA charts of (*S*)-*m*-X-MA·(-)-ADPE salt (X = Cl, Br, I) crystallized from water. Heating rate was 10 °C/min.

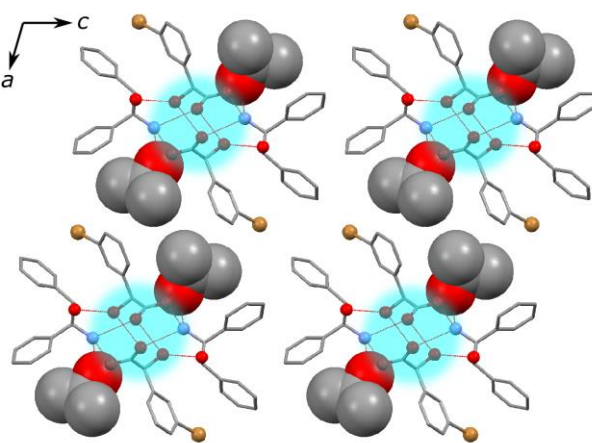

Figure S7. Crystal structure of less-soluble (*S*)-*m*-Br-MA·(-)-ADPE·*i*-PrOH salt prepared from 2-propanol solution. Oxygen and nitrogen atoms are represented with red and blue balls. Bromine atoms are represented with green balls. The dotted lines show hydrogen bonds.



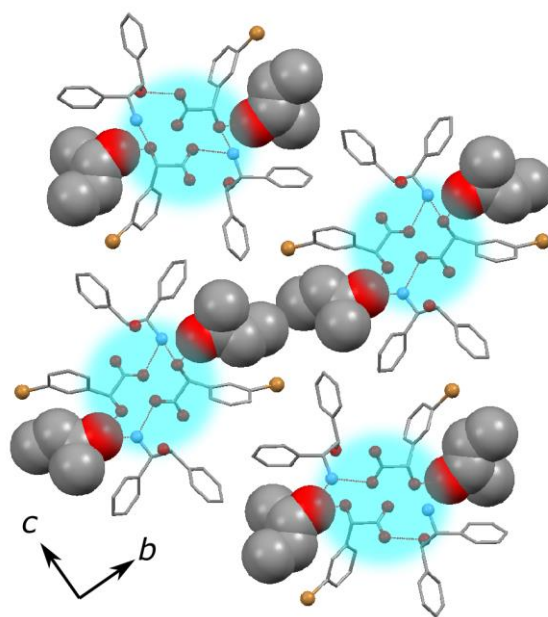

Figure S8. Crystal structure of  $(S)\text{-}m\text{-Br-MA}\cdot(+)\text{-ADPE}\cdot s\text{-BuOH}$  salt prepared from 2-butanol solution. Oxygen and nitrogen atoms are represented with red and blue balls. Bromine atoms are represented with green balls. The dotted lines show hydrogen bonds.

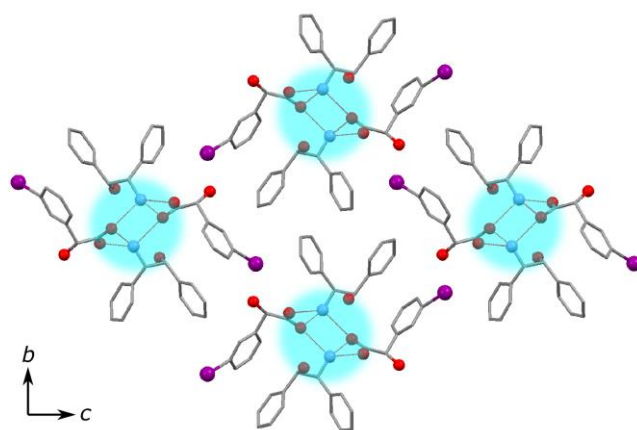

Figure S9. Crystal structure of more-soluble (*R*)-*m*-I-MA·(-)-ADPE salt prepared from toluene solution. Oxygen and nitrogen atoms are represented with red and blue balls. Iodine atoms are represented with purple balls. The dotted lines show hydrogen bonds.

Table S1. Summary of crystallographic data reported in this study.

|                                                                   | (S)-p-F-MA · (1R,2S)-ADPE                                                                                         | (S)-p-Cl-MA · (1R,2S)-ADPE                                                                                         | (S)-p-Br-MA · (1R,2S)-ADPE                                                                                         | (S)-MA · (1R,2S)-ADPE                                                                                            | (S)-m-Cl-MA · (1R,2S)-ADPE                                                                                         |
|-------------------------------------------------------------------|-------------------------------------------------------------------------------------------------------------------|--------------------------------------------------------------------------------------------------------------------|--------------------------------------------------------------------------------------------------------------------|------------------------------------------------------------------------------------------------------------------|--------------------------------------------------------------------------------------------------------------------|
| empirical formula                                                 | (C <sub>8</sub> H <sub>6</sub> O <sub>3</sub> F) <sup>-</sup> · (C <sub>14</sub> H <sub>16</sub> NO) <sup>+</sup> | (C <sub>8</sub> H <sub>6</sub> O <sub>3</sub> Cl) <sup>-</sup> · (C <sub>14</sub> H <sub>16</sub> NO) <sup>+</sup> | (C <sub>8</sub> H <sub>6</sub> O <sub>3</sub> Br) <sup>-</sup> · (C <sub>14</sub> H <sub>16</sub> NO) <sup>+</sup> | (C <sub>8</sub> H <sub>7</sub> O <sub>3</sub> ) <sup>-</sup> · (C <sub>14</sub> H <sub>16</sub> NO) <sup>+</sup> | (C <sub>8</sub> H <sub>6</sub> O <sub>3</sub> Cl) <sup>-</sup> · (C <sub>14</sub> H <sub>16</sub> NO) <sup>+</sup> |
| formula weight                                                    | 383.4                                                                                                             | 399.85                                                                                                             | 444.31                                                                                                             | 365.41                                                                                                           | 399.85                                                                                                             |
| temperature (K)                                                   | 150                                                                                                               | 150                                                                                                                | 150                                                                                                                | 150                                                                                                              | 150                                                                                                                |
| crystal size (mm)                                                 | 0.66 × 0.15 × 0.03                                                                                                | 0.60 × 0.08 × 0.03                                                                                                 | 0.92 × 0.32 × 0.05                                                                                                 | 0.45 × 0.02 × 0.01                                                                                               | 0.45 × 0.02 × 0.01                                                                                                 |
| crystal system                                                    | monoclinic                                                                                                        | monoclinic                                                                                                         | monoclinic                                                                                                         | monoclinic                                                                                                       | monoclinic                                                                                                         |
| space group                                                       | <i>P</i> 2 <sub>1</sub>                                                                                           | <i>P</i> 2 <sub>1</sub>                                                                                            | <i>P</i> 2 <sub>1</sub>                                                                                            | <i>C</i> 2                                                                                                       | <i>P</i> 2 <sub>1</sub>                                                                                            |
| <i>a</i> (Å)                                                      | 10.740(2)                                                                                                         | 10.675(11)                                                                                                         | 10.615(5)                                                                                                          | 30.206(6)                                                                                                        | 10.760(2)                                                                                                          |
| <i>b</i> (Å)                                                      | 6.0284(13)                                                                                                        | 6.069(6)                                                                                                           | 6.262(3)                                                                                                           | 5.9102(11)                                                                                                       | 6.3327(13)                                                                                                         |
| <i>c</i> (Å)                                                      | 16.127(4)                                                                                                         | 16.123(17)                                                                                                         | 15.743(8)                                                                                                          | 10.554(2)                                                                                                        | 15.567(3)                                                                                                          |
| $\alpha$ (°)                                                      | 90                                                                                                                | 90                                                                                                                 | 90                                                                                                                 | 90                                                                                                               | 90                                                                                                                 |
| $\beta$ (°)                                                       | 109.405(2)                                                                                                        | 107.088(12)                                                                                                        | 106.458(5)                                                                                                         | 97.439(2)                                                                                                        | 109.277(3)                                                                                                         |
| $\gamma$ (°)                                                      | 90                                                                                                                | 90                                                                                                                 | 90                                                                                                                 | 90                                                                                                               | 90                                                                                                                 |
| <i>V</i> (Å <sup>3</sup> )                                        | 984.9(4)                                                                                                          | 998.4(18)                                                                                                          | 1003.7(9)                                                                                                          | 1868.3(6)                                                                                                        | 1001.2(4)                                                                                                          |
| <i>Z</i>                                                          | 2                                                                                                                 | 2                                                                                                                  | 2                                                                                                                  | 4                                                                                                                | 2                                                                                                                  |
| <i>D</i> <sub>c</sub> (g/cm <sup>3</sup> )                        | 1.293                                                                                                             | 1.330                                                                                                              | 1.470                                                                                                              | 1.299                                                                                                            | 1.326                                                                                                              |
| $\mu$ (MoK $\alpha$ ) (mm <sup>-1</sup> )                         | 0.095                                                                                                             | 0.219                                                                                                              | 2.076                                                                                                              | 0.089                                                                                                            | 0.219                                                                                                              |
| $\theta_{\min/\max}$ (°)                                          | 1.339/24.985                                                                                                      | 1.321/25.000                                                                                                       | 1.349/24.999                                                                                                       | 1.360/25.000                                                                                                     | 1.386/24.996                                                                                                       |
| <i>R</i> 1 [ <i>F</i> <sub>o</sub> > 2σ( <i>F</i> <sub>o</sub> )] | 0.1035                                                                                                            | 0.1179                                                                                                             | 0.0735                                                                                                             | 0.0716                                                                                                           | 0.0669                                                                                                             |
| <i>wR</i> 2 (all <i>F</i> <sub>o</sub> <sup>2</sup> )             | 0.273                                                                                                             | 0.2937                                                                                                             | 0.1874                                                                                                             | 0.178                                                                                                            | 0.1625                                                                                                             |
| GOF                                                               | 1.095                                                                                                             | 1.154                                                                                                              | 1.061                                                                                                              | 1.01                                                                                                             | 0.944                                                                                                              |
| Flack parameter                                                   | 0.0(10)                                                                                                           | -0.1(3)                                                                                                            | 0.01(2)                                                                                                            | -9.8(10)                                                                                                         | -0.1(2)                                                                                                            |
| measured reflns                                                   | 4630                                                                                                              | 4546                                                                                                               | 4650                                                                                                               | 4460                                                                                                             | 4809                                                                                                               |
| independent reflns                                                | 3007                                                                                                              | 3085                                                                                                               | 3217                                                                                                               | 2977                                                                                                             | 3292                                                                                                               |
| observed reflns                                                   | 2893                                                                                                              | 2263                                                                                                               | 2989                                                                                                               | 2540                                                                                                             | 2252                                                                                                               |
| reflns used                                                       | 3007                                                                                                              | 3085                                                                                                               | 3217                                                                                                               | 2977                                                                                                             | 3292                                                                                                               |
| parameters                                                        | 261                                                                                                               | 253                                                                                                                | 255                                                                                                                | 244                                                                                                              | 270                                                                                                                |
| CCDC number                                                       | 1913091                                                                                                           | 1913092                                                                                                            | 1913093                                                                                                            | 1913094                                                                                                          | 1913095                                                                                                            |

Table S1. Summary of crystallographic data reported in this study (continued).

|                                                                   | <b>(S)-m-Br-MA · (1R,2S)-ADPE</b>          | <b>(R)-m-Cl-MA · (1R,2S)-ADPE</b>          | <b>(S)-m-Br-MA · (1S,2R)-ADPE</b>          | <b>(S)-m-Cl-MA · (1R,2S)-ADPE · 2-propanol</b>             | <b>(S)-m-Br-MA · (1R,2S)-ADPE · 2-propanol</b>             |
|-------------------------------------------------------------------|--------------------------------------------|--------------------------------------------|--------------------------------------------|------------------------------------------------------------|------------------------------------------------------------|
| empirical formula                                                 | $(C_8H_6O_3Br)^- \cdot (C_{14}H_{16}NO)^+$ | $(C_8H_6O_3Cl)^- \cdot (C_{14}H_{16}NO)^+$ | $(C_8H_6O_3Br)^- \cdot (C_{14}H_{16}NO)^+$ | $(C_8H_6O_3Cl)^- \cdot (C_{14}H_{16}NO)^+ \cdot (C_3H_8O)$ | $(C_8H_6O_3Br)^- \cdot (C_{14}H_{16}NO)^+ \cdot (C_3H_8O)$ |
| formula weight                                                    | 444.31                                     | 399.85                                     | 444.31                                     | 459.95                                                     | 504.41                                                     |
| temperature (K)                                                   | 150                                        | 150                                        | 150                                        | 150                                                        | 150                                                        |
| crystal size (mm)                                                 | 0.50 × 0.02 × 0.01                         | 0.48 × 0.02 × 0.01                         | 0.25 × 0.03 × 0.02                         | 0.21 × 0.02 × 0.01                                         | 0.44 × 0.03 × 0.03                                         |
| crystal system                                                    | monoclinic                                 | orthorhombic                               | orthorhombic                               | monoclinic                                                 | monoclinic                                                 |
| space group                                                       | $P2_1$                                     | $P2_12_12_1$                               | $P2_12_12_1$                               | $C2$                                                       | $C2$                                                       |
| <i>a</i> (Å)                                                      | 10.785(3)                                  | 5.6070(9)                                  | 5.6728(13)                                 | 26.10(2)                                                   | 26.377(9)                                                  |
| <i>b</i> (Å)                                                      | 6.2318(14)                                 | 13.999(2)                                  | 14.074(3)                                  | 5.801(5)                                                   | 5.8418(19)                                                 |
| <i>c</i> (Å)                                                      | 15.842(4)                                  | 24.658(4)                                  | 24.467(6)                                  | 16.174(13)                                                 | 16.368(5)                                                  |
| $\alpha$ (°)                                                      | 90                                         | 90                                         | 90                                         | 90                                                         | 90                                                         |
| $\beta$ (°)                                                       | 109.254(3)                                 | 90                                         | 90                                         | 106.512(10)                                                | 106.204(4)                                                 |
| $\gamma$ (°)                                                      | 90                                         | 90                                         | 90                                         | 90                                                         | 90                                                         |
| <i>V</i> (Å <sup>3</sup> )                                        | 1005.2(4)                                  | 1935.5(5)                                  | 1953.4(8)                                  | 2348(3)                                                    | 2421.9(14)                                                 |
| <i>Z</i>                                                          | 2                                          | 4                                          | 4                                          | 4                                                          | 4                                                          |
| <i>D<sub>c</sub></i> (g/cm <sup>3</sup> )                         | 1.468                                      | 1.372                                      | 1.511                                      | 1.301                                                      | 1.383                                                      |
| $\mu$ (MoK $\alpha$ ) (mm <sup>-1</sup> )                         | 2.072                                      | 0.226                                      | 2.133                                      | 0.199                                                      | 1.732                                                      |
| $\theta_{\min/\max}$ (°)                                          | 1.362/24.990                               | 1.652/25.000                               | 1.665/24.996                               | 1.313/24.999                                               | 1.296/25.000                                               |
| <i>R</i> 1 [ <i>F</i> <sub>o</sub> > 2σ( <i>F</i> <sub>o</sub> )] | 0.0982                                     | 0.0607                                     | 0.0450                                     | 0.0940                                                     | 0.0602                                                     |
| <i>wR</i> 2 (all <i>F</i> <sub>o</sub> <sup>2</sup> )             | 0.2418                                     | 0.1434                                     | 0.1135                                     | 0.2273                                                     | 0.1377                                                     |
| GOF                                                               | 0.980                                      | 0.929                                      | 0.948                                      | 0.902                                                      | 0.891                                                      |
| Flack parameter                                                   | -0.01(3)                                   | 0.02(9)                                    | -0.001(12)                                 | -0.3(3)                                                    | 0.00(2)                                                    |
| measured reflns                                                   | 4758                                       | 9286                                       | 9378                                       | 5487                                                       | 5824                                                       |
| independent reflns                                                | 3196                                       | 3414                                       | 3436                                       | 3835                                                       | 3678                                                       |
| observed reflns                                                   | 2268                                       | 2764                                       | 2958                                       | 1793                                                       | 2355                                                       |
| reflns used                                                       | 3196                                       | 3414                                       | 3436                                       | 3835                                                       | 3678                                                       |
| parameters                                                        | 267                                        | 273                                        | 273                                        | 292                                                        | 294                                                        |
| CCDC number                                                       | 1913096                                    | 1913097                                    | 1913098                                    | 1913099                                                    | 1913100                                                    |

Table S1. Summary of crystallographic data reported in this study (continued).

|                                                                   | <b>(R)-m-Cl-MA · (1R,2S)-ADPE · 2-butanol</b>                                                                                                           | <b>(S)-m-Br-MA · (1S,2R)-ADPE · 2-butanol</b>                                                                                                           | <b>(R)-m-I-MA · (1R,2S)-ADPE · 1-butanol</b>                                                                                                           | <b>(S)-m-I-MA · (1R,2S)-ADPE · 2(H<sub>2</sub>O)</b>                                                                                    | <b>(R)-m-I-MA · (1R,2S)-ADPE</b>                                                                                  |
|-------------------------------------------------------------------|---------------------------------------------------------------------------------------------------------------------------------------------------------|---------------------------------------------------------------------------------------------------------------------------------------------------------|--------------------------------------------------------------------------------------------------------------------------------------------------------|-----------------------------------------------------------------------------------------------------------------------------------------|-------------------------------------------------------------------------------------------------------------------|
| empirical formula                                                 | (C <sub>8</sub> H <sub>6</sub> O <sub>3</sub> Cl) <sup>-</sup> · (C <sub>14</sub> H <sub>16</sub> NO) <sup>+</sup> · (C <sub>4</sub> H <sub>10</sub> O) | (C <sub>8</sub> H <sub>6</sub> O <sub>3</sub> Br) <sup>-</sup> · (C <sub>14</sub> H <sub>16</sub> NO) <sup>+</sup> · (C <sub>4</sub> H <sub>10</sub> O) | (C <sub>8</sub> H <sub>6</sub> O <sub>3</sub> I) <sup>-</sup> · (C <sub>14</sub> H <sub>16</sub> NO) <sup>+</sup> · (C <sub>4</sub> H <sub>10</sub> O) | (C <sub>8</sub> H <sub>6</sub> O <sub>3</sub> I) <sup>-</sup> · (C <sub>14</sub> H <sub>16</sub> NO) <sup>+</sup> · 2(H <sub>2</sub> O) | (C <sub>8</sub> H <sub>6</sub> O <sub>3</sub> I) <sup>-</sup> · (C <sub>14</sub> H <sub>16</sub> NO) <sup>+</sup> |
| formula weight                                                    | 473.97                                                                                                                                                  | 518.43                                                                                                                                                  | 565.42                                                                                                                                                 | 527.34                                                                                                                                  | 491.30                                                                                                            |
| temperature (K)                                                   | 150                                                                                                                                                     | 150                                                                                                                                                     | 150                                                                                                                                                    | 150                                                                                                                                     | 150                                                                                                               |
| crystal size (mm)                                                 | 0.40 × 0.02 × 0.02                                                                                                                                      | 0.75 × 0.02 × 0.01                                                                                                                                      | 0.35 × 0.02 × 0.02                                                                                                                                     | 0.36 × 0.02 × 0.02                                                                                                                      | 1.00 × 0.04 × 0.03                                                                                                |
| crystal system                                                    | orthorhombic                                                                                                                                            | orthorhombic                                                                                                                                            | monoclinic                                                                                                                                             | orthorhombic                                                                                                                            | orthorhombic                                                                                                      |
| space group                                                       | <i>P</i> 2 <sub>1</sub> 2 <sub>1</sub> 2 <sub>1</sub>                                                                                                   | <i>P</i> 2 <sub>1</sub> 2 <sub>1</sub> 2 <sub>1</sub>                                                                                                   | <i>P</i> 2 <sub>1</sub>                                                                                                                                | <i>P</i> 2 <sub>1</sub> 2 <sub>1</sub> 2                                                                                                | <i>P</i> 2 <sub>1</sub> 2 <sub>1</sub> 2 <sub>1</sub>                                                             |
| <i>a</i> (Å)                                                      | 5.5803(15)                                                                                                                                              | 5.586(3)                                                                                                                                                | 13.907(8)                                                                                                                                              | 24.310(5)                                                                                                                               | 5.8084(13)                                                                                                        |
| <i>b</i> (Å)                                                      | 18.221(5)                                                                                                                                               | 18.293(9)                                                                                                                                               | 5.348(3)                                                                                                                                               | 32.200(6)                                                                                                                               | 14.178(3)                                                                                                         |
| <i>c</i> (Å)                                                      | 24.567(6)                                                                                                                                               | 24.714(12)                                                                                                                                              | 16.966(9)                                                                                                                                              | 5.6265(11)                                                                                                                              | 24.289(5)                                                                                                         |
| <i>α</i> (°)                                                      | 90                                                                                                                                                      | 90                                                                                                                                                      | 90                                                                                                                                                     | 90                                                                                                                                      | 90                                                                                                                |
| <i>β</i> (°)                                                      | 90                                                                                                                                                      | 90                                                                                                                                                      | 95.847(8)                                                                                                                                              | 90                                                                                                                                      | 90                                                                                                                |
| <i>γ</i> (°)                                                      | 90                                                                                                                                                      | 90                                                                                                                                                      | 90                                                                                                                                                     | 90                                                                                                                                      | 90                                                                                                                |
| <i>V</i> (Å <sup>3</sup> )                                        | 2498.0(12)                                                                                                                                              | 2525(2)                                                                                                                                                 | 1255.2(12)                                                                                                                                             | 4404.3(15)                                                                                                                              | 2000.2(8)                                                                                                         |
| <i>Z</i>                                                          | 4                                                                                                                                                       | 4                                                                                                                                                       | 2                                                                                                                                                      | 8                                                                                                                                       | 4                                                                                                                 |
| <i>D<sub>c</sub></i> (g/cm <sup>3</sup> )                         | 1.26                                                                                                                                                    | 1.364                                                                                                                                                   | 1.496                                                                                                                                                  | 1.591                                                                                                                                   | 1.631                                                                                                             |
| <i>μ</i> (MoK <sub>α</sub> ) (mm <sup>-1</sup> )                  | 0.189                                                                                                                                                   | 1.663                                                                                                                                                   | 1.311                                                                                                                                                  | 1.492                                                                                                                                   | 1.629                                                                                                             |
| <i>θ</i> <sub>min/max</sub> (°)                                   | 1.391/24.989                                                                                                                                            | 1.385/24.990                                                                                                                                            | 1.206/24.996                                                                                                                                           | 1.265/24.993                                                                                                                            | 1.663/24.990                                                                                                      |
| <i>R</i> 1 [ <i>F</i> <sub>o</sub> > 2σ( <i>F</i> <sub>o</sub> )] | 0.0502                                                                                                                                                  | 0.0684                                                                                                                                                  | 0.076                                                                                                                                                  | 0.0704                                                                                                                                  | 0.0758                                                                                                            |
| <i>wR</i> 2 (all <i>F</i> <sub>o</sub> <sup>2</sup> )             | 0.1056                                                                                                                                                  | 0.1243                                                                                                                                                  | 0.1373                                                                                                                                                 | 0.1551                                                                                                                                  | 0.1634                                                                                                            |
| GOF                                                               | 0.911                                                                                                                                                   | 0.853                                                                                                                                                   | 0.91                                                                                                                                                   | 0.914                                                                                                                                   | 1.023                                                                                                             |
| Flack parameter                                                   | -0.04(9)                                                                                                                                                | -0.012(18)                                                                                                                                              | 0.01(6)                                                                                                                                                | 0.01(4)                                                                                                                                 | -0.02(4)                                                                                                          |
| measured reflns                                                   | 12025                                                                                                                                                   | 12056                                                                                                                                                   | 5935                                                                                                                                                   | 21375                                                                                                                                   | 9476                                                                                                              |
| independent reflns                                                | 4408                                                                                                                                                    | 4441                                                                                                                                                    | 3583                                                                                                                                                   | 7750                                                                                                                                    | 3512                                                                                                              |
| observed reflns                                                   | 3140                                                                                                                                                    | 2787                                                                                                                                                    | 2315                                                                                                                                                   | 4652                                                                                                                                    | 3240                                                                                                              |
| reflns used                                                       | 4408                                                                                                                                                    | 4441                                                                                                                                                    | 3583                                                                                                                                                   | 7750                                                                                                                                    | 3512                                                                                                              |
| parameters                                                        | 335                                                                                                                                                     | 311                                                                                                                                                     | 301                                                                                                                                                    | 542                                                                                                                                     | 243                                                                                                               |
| CCDC number                                                       | 1913101                                                                                                                                                 | 1913102                                                                                                                                                 | 1913103                                                                                                                                                | 1913104                                                                                                                                 | 1913105                                                                                                           |

Table S2. Hydrogen bond metrics of the crystals reported in this study.

| Compound name                     | D-H...A     | D-H / Å | H-A / Å | D-A / Å | ∠D-H...A / ° |
|-----------------------------------|-------------|---------|---------|---------|--------------|
| <b>(S)-p-F-MA · (1R,2S)-ADPE</b>  |             |         |         |         |              |
|                                   | N1-H20...O3 | 1.033   | 1.686   | 2.713   | 172.69       |
|                                   | N1-H21...O2 | 1.033   | 1.865   | 2.818   | 151.77       |
|                                   | N1-H22...O2 | 1.033   | 1.733   | 2.746   | 166.04       |
|                                   | O1-H18...O4 | 0.655   | 2.302   | 2.838   | 140.45       |
| <b>(S)-p-Cl-MA · (1R,2S)-ADPE</b> |             |         |         |         |              |
|                                   | N1-H19...O4 | 1.033   | 1.658   | 2.688   | 174.09       |
|                                   | N1-H20...O2 | 1.033   | 1.860   | 2.814   | 151.93       |
|                                   | N1-H21...O2 | 1.033   | 1.737   | 2.741   | 162.95       |
|                                   | O3-H22...O1 | 0.840   | 2.127   | 2.826   | 140.41       |
| <b>(S)-p-Br-MA · (1R,2S)-ADPE</b> |             |         |         |         |              |
|                                   | N1-H20...O4 | 1.033   | 1.660   | 2.692   | 176.19       |
|                                   | N1-H21...O1 | 1.032   | 1.744   | 2.738   | 160.40       |
|                                   | N1-H22...O1 | 1.033   | 1.855   | 2.817   | 153.45       |
|                                   | O2-H1...O3  | 0.840   | 1.945   | 2.772   | 168.04       |
| <b>(S)-MA · (1R,2S)-ADPE</b>      |             |         |         |         |              |
|                                   | N1-H21...O3 | 1.034   | 1.710   | 2.723   | 165.38       |
|                                   | N1-H22...O1 | 1.033   | 1.752   | 2.774   | 169.65       |
|                                   | N1-H23...O1 | 1.033   | 1.879   | 2.859   | 157.16       |
|                                   | O4-H11...O2 | 0.839   | 2.070   | 2.842   | 152.71       |
| <b>(S)-m-Cl-MA · (1R,2S)-ADPE</b> |             |         |         |         |              |
|                                   | N2-H19...O2 | 0.922   | 1.928   | 2.810   | 159.58       |
|                                   | N2-H20...O2 | 0.937   | 1.931   | 2.748   | 144.48       |
|                                   | N2-H21...O3 | 0.983   | 1.754   | 2.719   | 166.11       |
|                                   | O1-H18...O4 | 0.745   | 2.075   | 2.785   | 159.39       |
| <b>(S)-m-Br-MA · (1R,2S)-ADPE</b> |             |         |         |         |              |
|                                   | N1-H18...O4 | 0.984   | 1.736   | 2.711   | 170.62       |
|                                   | N1-H19...O2 | 1.038   | 1.797   | 2.741   | 149.17       |
|                                   | N1-H20...O2 | 0.794   | 2.085   | 2.832   | 156.69       |
|                                   | O1-H22...O5 | 0.840   | 1.988   | 2.812   | 166.45       |
| <b>(R)-m-Cl-MA · (1R,2S)-ADPE</b> |             |         |         |         |              |
|                                   | N1-H18...O3 | 0.768   | 2.008   | 2.772   | 173.28       |
|                                   | N1-H19...O5 | 1.044   | 1.849   | 2.805   | 150.59       |
|                                   | N1-H20...O3 | 1.055   | 1.739   | 2.750   | 159.12       |
| <b>(S)-m-Br-MA · (1S,2R)-ADPE</b> |             |         |         |         |              |
|                                   | N1-H3...O4  | 0.874   | 1.950   | 2.818   | 171.47       |
|                                   | N1-H4...O3  | 0.886   | 1.940   | 2.755   | 152.26       |
|                                   | N1-H5...O3  | 0.843   | 1.978   | 2.768   | 155.59       |

Table S2. Hydrogen bond metrics of the crystals reported in this study (continued).

| Compound name                                  | D-H...A     | D-H / Å | H-A / Å | D-A / Å | ∠D-H...A / ° |
|------------------------------------------------|-------------|---------|---------|---------|--------------|
| <b>(S)-m-Cl-MA · (1R,2S)-ADPE · 2-propanol</b> |             |         |         |         |              |
|                                                | N1-H3...O3  | 1.034   | 1.834   | 2.820   | 158.20       |
|                                                | N1-H4...O5  | 1.033   | 1.696   | 2.704   | 163.94       |
|                                                | N1-H5...O4  | 1.033   | 1.905   | 2.763   | 138.29       |
|                                                | O1-H1...O3  | 0.841   | 1.918   | 2.709   | 156.11       |
|                                                | O2-H2...O1  | 0.839   | 1.872   | 2.684   | 162.36       |
|                                                | O5-H14...O4 | 0.840   | 2.010   | 2.610   | 127.75       |
| <b>(S)-m-Br-MA · (1R,2S)-ADPE · 2-propanol</b> |             |         |         |         |              |
|                                                | N1-H28...O4 | 1.032   | 1.836   | 2.818   | 157.54       |
|                                                | N1-H29...O3 | 1.033   | 1.914   | 2.777   | 138.91       |
|                                                | N1-H30...O5 | 1.033   | 1.699   | 2.705   | 163.29       |
|                                                | O1-H1...O4  | 0.840   | 1.959   | 2.745   | 155.59       |
|                                                | O2-H2...O1  | 0.840   | 1.952   | 2.728   | 153.29       |
|                                                | O5-H8...O3  | 0.840   | 1.932   | 2.653   | 143.30       |
| <b>(R)-m-Cl-MA · (1R,2S)-ADPE · 2-butanol</b>  |             |         |         |         |              |
|                                                | N1-H36...O2 | 0.926   | 2.099   | 2.914   | 146.23       |
|                                                | N1-H37...O5 | 0.979   | 1.789   | 2.759   | 170.16       |
|                                                | N1-H38...O3 | 1.005   | 1.732   | 2.702   | 161.14       |
|                                                | O1-H1...O4  | 0.839   | 1.774   | 2.609   | 172.75       |
|                                                | O5-H39...O2 | 0.840   | 2.060   | 2.849   | 156.21       |
| <b>(S)-m-Br-MA · (1S,2R)-ADPE · 2-butanol</b>  |             |         |         |         |              |
|                                                | N1-H36...O1 | 1.033   | 1.719   | 2.710   | 159.14       |
|                                                | N1-H37...O5 | 1.034   | 1.763   | 2.761   | 160.90       |
|                                                | N1-H38...O3 | 1.034   | 2.078   | 2.919   | 136.90       |
|                                                | O2-H1...O4  | 0.840   | 1.781   | 2.609   | 168.04       |
|                                                | O5-H40...O3 | 0.840   | 2.066   | 2.848   | 154.62       |
| <b>(R)-m-I-MA · (1R,2S)-ADPE · 1-butanol</b>   |             |         |         |         |              |
|                                                | N1-H30...O2 | 1.033   | 1.658   | 2.677   | 167.91       |
|                                                | N1-H31...O5 | 1.033   | 1.979   | 2.836   | 138.46       |
|                                                | N1-H32...O1 | 1.033   | 1.747   | 2.758   | 165.10       |
|                                                | O3-H2...O4  | 0.840   | 1.811   | 2.618   | 160.63       |
|                                                | O1-H33...O5 | 0.840   | 2.124   | 2.899   | 153.32       |

Table S2. Hydrogen bond metrics of the crystals reported in this study (continued).

| Compound name                                        | D-H...A      | D-H / Å | H-A / Å | D-A / Å | ∠D-H...A / ° |
|------------------------------------------------------|--------------|---------|---------|---------|--------------|
| <b>(S)-m-I-MA · (1R,2S)-ADPE · 2(H<sub>2</sub>O)</b> |              |         |         |         |              |
|                                                      | N1-H1A...O9  | 1.034   | 1.778   | 2.704   | 147.00       |
|                                                      | N1-H1B...O8  | 1.033   | 1.851   | 2.815   | 153.65       |
|                                                      | N1-H1C...O5  | 1.033   | 1.906   | 2.815   | 144.97       |
|                                                      | N2-H2A...O10 | 1.033   | 1.982   | 2.909   | 147.86       |
|                                                      | N2-H2B...O7  | 1.033   | 1.765   | 2.714   | 150.77       |
|                                                      | N2-H2C...O6  | 1.032   | 1.877   | 2.864   | 158.91       |
|                                                      | O2-H4O...O5  | 0.839   | 2.072   | 2.784   | 142.34       |
|                                                      | O4...O2      |         |         | 2.842   |              |
|                                                      | O5...O11     |         |         | 2.748   |              |
|                                                      | O6...O7      |         |         | 2.748   |              |
|                                                      | O6...O12     |         |         | 2.783   |              |
|                                                      | O8...O9      |         |         | 2.727   |              |
|                                                      | O8...O11     |         |         | 2.864   |              |
|                                                      | O11...O12    |         |         | 2.801   |              |
|                                                      |              |         |         |         |              |
| <b>(R)-m-I-MA · (1R,2S)-ADPE</b>                     |              |         |         |         |              |
|                                                      | N1-H20...O1  | 1.033   | 1.738   | 2.761   | 169.93       |
|                                                      | N1-H21...O1  | 1.033   | 1.810   | 2.771   | 153.08       |
|                                                      | N1-H22...O4  | 1.033   | 1.818   | 2.826   | 164.19       |



## General and Materials

All the  $^1\text{H}$  and  $^{13}\text{C}$  NMR spectra were recorded on a 300, 400 or 500 MHz spectrometer. IR spectra were reported in reciprocal centimeters. Melting points are uncorrected. Optical rotation values were measured with a polarimeter. All the solvents and (1*R*,2*S*)-(-)-ADPE were purchased and used as received. The enantiomeric excess of the mandelic acids was determined by chiral HPLC analysis (Daicel Chiralcel OD-3 column 4.6 × 250 mm) with UV detection at 254 nm after derivatized to the corresponding methyl esters by the reaction with TMSCHN<sub>2</sub>.

### Synthesis and characterization

Halogen substituted mandelic acids except for 4-fluoromandelic acid were prepared from the corresponding acetophenones by  $\alpha$ -dibromination followed by hydrolysis under basic condition.<sup>1</sup> 4-Fluoromandelic acid was synthesized from 4-fluorobenzaldehyde according to the literature procedure.<sup>2</sup>

**Procedure for the synthesis of 4-bromomandelic acid (*p*-Br-MA):** 4-Bromoacetophenone (9.96 g, 50.0 mmol) was dissolved in acetic acid (30 mL) and the solution was cooled to 20 °C. To the solution was added dropwise bromine (16.3 g, 102 mmol) dissolved in acetic acid (10 mL) while maintaining the temperature below 40 °C. After stirring for 2 hours at 0 °C, the precipitated solid was filtered and washed with 50% ethanol and dried under reduced pressure to afford  $\alpha,\alpha,4$ -tribromoacetophenone as a white solid (14.0 g, 39.2 mmol, 79%). Mp. 93-95 °C.  $^1\text{H}$  NMR (500 MHz, CDCl<sub>3</sub>):  $\delta$  (ppm) 7.97 (d,  $J$  = 8.8 Hz, 2H), 7.66 (d,  $J$  = 8.8 Hz, 2H), 6.59 (s, 1H). IR (KBr):  $\nu$  (cm<sup>-1</sup>) 3447, 3040, 1693, 1582, 1395, 1202, 1070.

To the ice-cooled mixture of  $\alpha,\alpha,4$ -tribromoacetophenone (13.9 g, 39.0 mmol) and water (15 mL) was added dropwise NaOH aq. (19.8 M, 10 mL) and the mixture was stirred for 3 days below 5 °C. Insoluble solid was filtered off and washed with water. The filtrate was washed with ether (20 mL × 7) and the aqueous phase was acidified with conc. HCl aq. (20 mL). The aqueous phase was extracted with ether (20 mL × 4) and the combined organic phase was dried over anhydrous sodium sulfate. After concentration under reduced pressure, the residue was dissolved in methanol and benzylamine (4.08 g, 38.1 mmol) was added. After the solvent was removed under reduced pressure, the solid was recrystallized from 80% ethanol (51 mL). The obtained salt was added to 1N HCl aq. and extracted with ether (10 mL × 3). The combined organic phase was dried over anhydrous sodium sulfate and the solvent was removed under reduced pressure to give 4-bromomandelic acid (7.40 g, 32.0 mmol, 83%) as a white solid. Mp. 118.5-120.0 °C.  $^1\text{H}$  NMR (300 MHz, CDCl<sub>3</sub>):  $\delta$  (ppm) 7.52 (d,  $J$  = 8.4 Hz, 2H), 7.34 (d,  $J$  = 8.4 Hz, 2H), 5.23 (s, 1H). IR (KBr):  $\nu$  (cm<sup>-1</sup>) 3411, 2964, 1725, 1490, 1260, 1189, 1058.

*p*-Cl-MA, *o*-Cl-MA, *m*-Cl-MA, *m*-Br-MA, *m*-I-MA were prepared according to the above procedure.

**$\alpha,\alpha$ -dibromo-4-chloroacetophenone.** Pale yellow solid. Yield 72%. Mp. 93-96 °C.  $^1\text{H}$  NMR (300 MHz,  $\text{CDCl}_3$ ):  $\delta$  (ppm) 8.05 (d,  $J = 8.9$  Hz, 2H), 7.49 (d,  $J = 8.9$  Hz, 2H), 6.60 (s, 1H). IR (KBr):  $\nu$  ( $\text{cm}^{-1}$ ) 3037, 1695, 1587, 1401, 1276, 1205, 1093, 988.

**$\alpha,\alpha$ -dibromo-2-chloroacetophenone.** Purified by silica gel column chromatography (eluent; hexane :  $\text{CHCl}_3 = 3 : 1$ ) and obtained as pale yellow oil. Yield 67%.  $^1\text{H}$  NMR (300 MHz,  $\text{CDCl}_3$ ):  $\delta$  (ppm) 7.65-7.62 (m, 1H), 7.51-7.47 (m, 2H), 7.43-7.37 (m, 1H), 6.79 (s, 1H). IR (neat):  $\nu$  ( $\text{cm}^{-1}$ ) 3427, 3008, 1722, 1589, 1435, 1198, 1065.

**$\alpha,\alpha$ -dibromo-3-chloroacetophenone.** Purified by silica gel column chromatography (eluent; hexane :  $\text{CHCl}_3 = 3 : 1$ ) and obtained as pale yellow oil. Yield 88%.  $^1\text{H}$  NMR (500 MHz,  $\text{CDCl}_3$ ):  $\delta$  (ppm) 8.07 (dd,  $J_1 = J_2 = 1.7$  Hz, 1H), 7.98 (ddd,  $J_1 = 7.9$  Hz,  $J_2 = J_3 = 1.7$  Hz, 1H), 7.63-7.59 (m, 1H), 7.46 (dd,  $J_1 = J_2 = 7.9$  Hz, 1H), 6.62 (s, 1H). IR (neat):  $\nu$  ( $\text{cm}^{-1}$ ) 3384, 3013, 1701, 1566, 1419, 1254, 1069.

**$\alpha,\alpha,3$ -tribromoacetophenone.** Purified by silica gel column chromatography (eluent; hexane :  $\text{CHCl}_3 = 3 : 1$ ) and obtained as pale yellow oil. Yield 90%.  $^1\text{H}$  NMR (500 MHz,  $\text{CDCl}_3$ ):  $\delta$  (ppm) 8.21 (dd,  $J_1 = J_2 = 1.8$  Hz, 1H), 8.04-8.01 (m, 1H), 7.78-7.74 (m, 1H), 7.39 (dd,  $J_1 = J_2 = 7.8$  Hz, 1H), 6.60 (s, 1H). IR (neat):  $\nu$  ( $\text{cm}^{-1}$ ) 3384, 3013, 1702, 1566, 1419, 1254, 1192, 1069.

**$\alpha,\alpha$ -dibromo-3-iodoacetophenone.** Purified by silica gel column chromatography (eluent; hexane :  $\text{CHCl}_3 = 1 : 1$ ) and obtained as pale yellow oil. Yield 85%.  $^1\text{H}$  NMR (400 MHz,  $\text{CDCl}_3$ ):  $\delta$  (ppm) 8.40 (dd,  $J_1 = J_2 = 1.6$  Hz, 1H), 8.07-8.05 (m, 1H), 7.98-7.95 (m, 1H), 7.25 (dd,  $J_1 = J_2 = 8.0$  Hz, 1H), 6.60 (s, 1H).  $^{13}\text{C}$  NMR (100 MHz,  $\text{CDCl}_3$ ):  $\delta$  (ppm) 184.6, 143.1, 138.5, 132.6, 130.4, 128.8, 94.4, 39.0. IR (neat):  $\nu$  ( $\text{cm}^{-1}$ ) 1699, 1560, 1414, 1254, 1190, 988, 806, 672, 654, 626. MALDI-TOF-MS:  $m/z = 402.76$  [ $\text{M}-\text{H}$ ] $^-$  (calcd. For  $\text{C}_8\text{H}_5\text{Br}_2\text{IO} - \text{H} = 402.77$ ).

**4-chloromandelic acid (*p*-Cl-MA).** White solid. Yield 76%. Mp. 120.5-122.0 °C.  $^1\text{H}$  NMR (300 MHz,  $\text{CDCl}_3$ ):  $\delta$  (ppm) 7.40 (d,  $J = 8.7$  Hz, 2H), 7.37 (d,  $J = 8.7$  Hz, 2H), 5.24 (s, 1H). IR (KBr):  $\nu$  ( $\text{cm}^{-1}$ ) 3411, 2964, 1725, 1490, 1260, 1189, 1058.

**2-chloromandelic acid (*o*-Cl-MA).** Pale yellow solid. Yield 80%. Mp. 86-88 °C.  $^1\text{H}$  NMR (300 MHz,  $\text{CDCl}_3$ ):  $\delta$  (ppm) 7.46-7.39 (m, 2H), 7.34-7.28 (m, 2H), 5.67 (s, 1H). IR (KBr):  $\nu$  ( $\text{cm}^{-1}$ ) 3195, 1751, 1694, 1477, 1218, 1072.

**3-chloromandelic acid (*m*-Cl-MA).** White solid. Yield 51%. Mp. 117-120 °C.  $^1\text{H}$  NMR (300 MHz,  $\text{CDCl}_3$ ):  $\delta$  (ppm) 7.49-7.47 (m, 1H), 7.38-7.32 (m, 3H), 5.24 (s, 1H). IR (KBr):  $\nu$  ( $\text{cm}^{-1}$ ) 3442, 2936, 1712, 1577, 1261, 1195, 1063.

**3-bromomandelic acid (*m*-Br-MA).** White solid. Yield 74%. Mp. 123.5-124.5 °C.  $^1\text{H}$  NMR (300 MHz,  $\text{CDCl}_3$ ):  $\delta$  (ppm) 7.64 (s, 1H), 7.47-7.39 (m, 2H), 7.24 (dd,  $J_1 = J_2 = 7.8$  Hz, 1H), 5.12 (s, 1H). IR (KBr):  $\nu$  ( $\text{cm}^{-1}$ ) 3443, 2933, 1710, 1572, 1474, 1260, 1191, 1097.

**3-iodomandelic acid (*m*-I-MA).** White solid. Yield 55%. Mp. 98-101 °C.  $^1\text{H}$  NMR (300 MHz,  $\text{CDCl}_3/\text{CD}_3\text{OD}$ ):  $\delta$  (ppm) 7.84 (s, 1H), 7.65 (d,  $J = 7.8$  Hz, 1H), 7.45 (d,  $J = 8.1$  Hz, 1H), 7.14-7.07 (m, 1H), 5.09 (s, 1H). IR (KBr):  $\nu$  ( $\text{cm}^{-1}$ ) 3390, 2928, 1739, 1287, 1179, 1106, 940, 780, 748, 685.

**4-fluoromandelic acid (*p*-F-MA).** To the cooled solution of lithium chloride (3.40 g, 80.2 mmol) and potassium hydroxide (9.02 g, 161 mmol) in water (32 mL) was added 1,4-dioxane (32 mL). To the solution were added dropwise 4-fluorobenzaldehyde (4.97 g, 40.1 mmol) and bromoform (10.1 g, 40.1 mmol). The mixture was stirred for 19 h at 5-10 °C and further 24 h at room temperature. The mixture was diluted with water and washed with ether (20 mL × 3) and the aqueous phase was acidified with 6N HCl aq. (50 mL). The aqueous phase was extracted with ether (50 mL × 10) and the combined organic phase was dried over anhydrous sodium sulfate. After concentration under reduced pressure, the residue was dissolved in methanol and benzylamine (3.98 g, 36.8 mmol) was added. After the solvent was removed under reduced pressure, the solid was recrystallized from 80% ethanol (69 mL). The obtained salt was added to 1N HCl aq. and extracted with ether (10 mL × 3). The combined organic phase was dried over anhydrous sodium sulfate and the solvent was removed under reduced pressure to give 4-fluoromandelic acid (5.21 g, 30.6 mmol, 76%) as a white solid. Mp. 130-132 °C. <sup>1</sup>H NMR (300 MHz, CDCl<sub>3</sub>): δ (ppm) 7.46-7.42 (m, 2H), 7.10-7.05 (m, 2H), 5.25 (s, 1H). IR (KBr): ν (cm<sup>-1</sup>) 3453, 2911, 1722, 1609, 1519, 1240, 1067.

### Enantioseparation experiments

Racemic mandelic acid (1 mmol) and (1*R*,2*S*)-ADPE (1 mmol) were dissolved in methanol. After concentration, the resulting white solids were recrystallized from an appropriate solvent to obtain the salt crystals, which were filtered and dried overnight. The apparent yield was calculated based on the <sup>1</sup>H NMR data, considering the amount of the included solvent. A portion of the salt was decomposed by the addition of 1 M aqueous HCl solution and the aqueous layer was extracted with diethyl ether. After drying over anhydrous Na<sub>2</sub>SO<sub>4</sub>, the organic layer was concentrated to obtain enantio-enriched MA. To a solution of MA in toluene (2 ml) and methanol (1 ml) was added TMSCHN<sub>2</sub> (ether solution) until the solution remained yellow. The mixture was stirred at room temperature and the solvent was removed under reduced pressure. The residue was purified by silica gel PTLC (hexane/ethyl acetate = 2:1) to produce methyl ester of MA as a colorless liquid. The ee value of the ester was determined by chiral HPLC analysis.

Methyl ester of *p*-Br-MA: Daicel Chiralcel OD-3, hexane/2-propanol=90:10, 1.0 mL/min; *t*<sub>r</sub>(*S*) = 8.1 min, *t*<sub>r</sub>(*R*) = 9.0 min.

Methyl ester of *p*-Cl-MA: Daicel Chiralcel OD-3, hexane/2-propanol=90:10, 1.0 mL/min; *t*<sub>r</sub>(*S*) = 7.4 min, *t*<sub>r</sub>(*R*) = 8.5 min.

Methyl ester of *p*-F-MA: Daicel Chiralcel OD-3, hexane/2-propanol=90:10, 1.0 mL/min; *t*<sub>r</sub>(*S*) = 7.6 min, *t*<sub>r</sub>(*R*) = 9.2 min.

Methyl ester of *m*-Cl-MA: Daicel Chiralcel OD-3, hexane/2-propanol=90:10, 1.0 mL/min; *t*<sub>r</sub>(*S*) = 7.3 min, *t*<sub>r</sub>(*R*) = 8.6 min.

Methyl ester of *m*-Br-MA: Daicel Chiralpak IB-3, hexane/2-propanol=90:10, 0.5 mL/min; *t*<sub>r</sub>(*S*) =

15.0 min,  $t_r(R)$  = 16.2 min.

Methyl ester of *m*-I-MA: Daicel Chiralcel OD-3, hexane/2-propanol=90:10, 1.0 mL/min;  $t_r(S)$  = 8.3 min,  $t_r(R)$  = 10.0 min.

### **X-ray crystallographic analysis**

Single crystals suitable for X-ray diffraction analysis were prepared by slow evaporation of the saturated solutions of the salts. X-ray crystallographic data were collected on a Bruker Smart APEX II diffractometer with graphite monochromated Mo K $\alpha$  radiation. Data collections were carried out at low temperatures (150 K). The structures were solved by a direct method (SIR 2014) and refined by SHELXL-2013 programs. Crystallographic information files have been deposited with the Cambridge Structural Database.

### **References**

- 1) Klingenberg, J. J. *Org. Synth.* **1955**, 35, 11-14.
- 2) Compere, E. L. *J. Org. Chem.* **1968**, 33, 2565-2566.
